# Supplementary material for: A Competency Assessment Tool for Unilateral Cleft Lip Repair
Source: PubMed Central journal article supplement — Plast Reconstr Surg Glob Open. 2020 Jul 14;8(7):e2954. doi: 10.1097/GOX.0000000000002954 (PMC7413813; doi:10.1097/gox.0000000000002954), 2020-07-14
Supplement: gox-8-e2954-s001.pdf [file gox-8-e2954-s001.pdf]

## UNILATERAL CLEFT LIP REPAIR PROCEDURAL CHECKLIST

|                                                                                                     |                                                                                                       | 1 | 2 | 3 | Sum/Max    |
|-----------------------------------------------------------------------------------------------------|-------------------------------------------------------------------------------------------------------|---|---|---|------------|
| <b>MARKING A CLEFT LIP REPAIR</b>                                                                   |                                                                                                       |   |   |   |            |
| 1                                                                                                   | Correctly identify anatomic landmarks                                                                 |   |   |   |            |
| 2                                                                                                   | Mark appropriate peaks of Cupid's bow on the greater and lesser segments                              |   |   |   |            |
| 3                                                                                                   | Design greater segment incision(s) to create a symmetric Cupid's bow                                  |   |   |   |            |
| 4                                                                                                   | Preserve excess vermilion on the lesser segment to augment deficient vermilion on the greater segment |   |   |   |            |
| <b>Marking Subtotal</b>                                                                             |                                                                                                       |   |   |   | <b>/12</b> |
| <b>PERFORMING A CLEFT LIP REPAIR</b>                                                                |                                                                                                       |   |   |   |            |
| 5                                                                                                   | Atraumatic tissue handling                                                                            |   |   |   |            |
| 6                                                                                                   | Avoid unnecessarily retaining or over-resecting tissue                                                |   |   |   |            |
| 7                                                                                                   | Dissect orbicularis oris muscle and free it's abnormal attachments                                    |   |   |   |            |
| 8                                                                                                   | Inferiorly reposition greater segment so the peaks of Cupid's bow are symmetric                       |   |   |   |            |
| 9                                                                                                   | Fully mobilize the lesser segment lip and alar base                                                   |   |   |   |            |
| 10                                                                                                  | Avoid over-dissection or under-dissection                                                             |   |   |   |            |
| 11                                                                                                  | Repair the oral mucosa                                                                                |   |   |   |            |
| 12                                                                                                  | Repair the orbicularis oris muscle avoiding deficiency or excess bulk                                 |   |   |   |            |
| 13                                                                                                  | Close the nasal floor mucosa                                                                          |   |   |   |            |
| 14                                                                                                  | Appropriate suture choice and precise cutaneous repair to minimize scarring                           |   |   |   |            |
| <b>Performing Subtotal</b>                                                                          |                                                                                                       |   |   |   | <b>/30</b> |
| <b>IMMEDIATE POST-OPERATIVE RESULT</b>                                                              |                                                                                                       |   |   |   |            |
| ***consider substituting pictorial scale (eg. <i>Campbell A, et al. PRS-GO. 2017;5(9):e1472</i> *** |                                                                                                       |   |   |   |            |
| 15                                                                                                  | Symmetric appearance of the peaks of Cupid's bow and philtral height                                  |   |   |   |            |
| 16                                                                                                  | Continuity of the vermilion-cutaneous junction and white roll                                         |   |   |   |            |
| 17                                                                                                  | Smooth contour of the lip margin                                                                      |   |   |   |            |
| 18                                                                                                  | Symmetry of the nasal tip, alar position, and nares                                                   |   |   |   |            |
| <b>Result Subtotal</b>                                                                              |                                                                                                       |   |   |   | <b>/12</b> |
| <b>TOTAL SCORE</b>                                                                                  |                                                                                                       |   |   |   | <b>/54</b> |

Grading scale for all question:

1-performed incorrectly or not at all

2-performed somewhat correctly

3-performed correctly, acceptable for an attending surgeon
